# Supplementary material for: Evaluation of the Accessibility of Molecules in Hydrogels Using a Scale of Spin Probes
Source: MDPI journal article supplement (doi:10.3390/gels8070428), 2022-07-08
Supplement: s1 [file s1]

## Supplementary Material

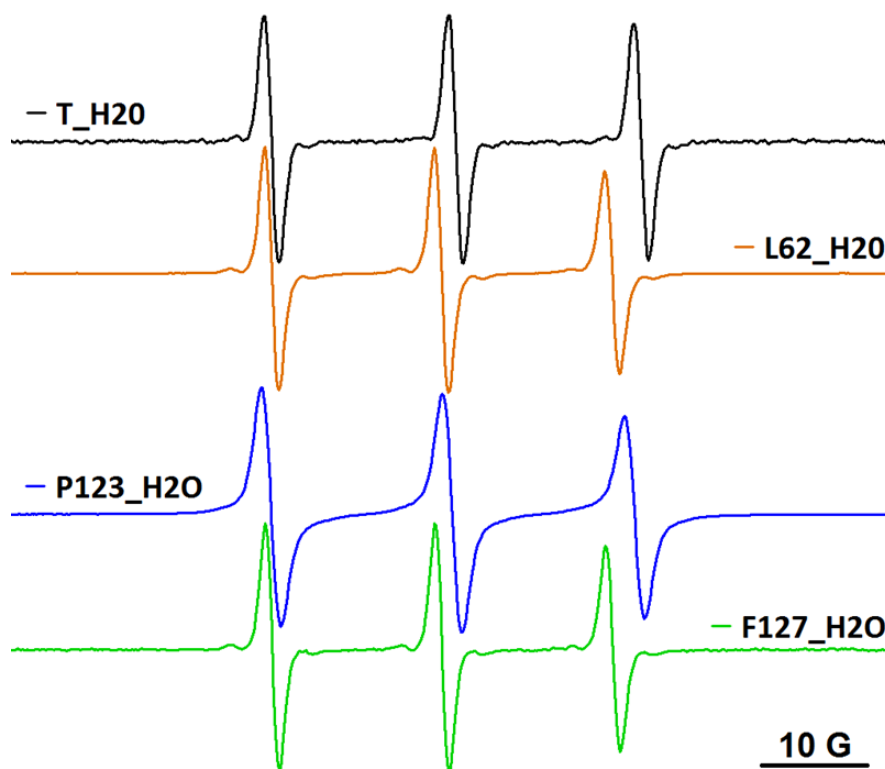

**Figure S1.** The EPR spectra of the nitroxide-type spin probes used for diffusion experiments in hydrogels.

**Table S1.** Encapsulation of polymeric spin probes in covalent hydrogels

| Gel                         | TEMPO | L62NO | P123NO | F127NO          | PEG8000-TEMPO   |
|-----------------------------|-------|-------|--------|-----------------|-----------------|
| PEG900/ $\beta$ -CD (10:1)  | Yes   | Yes   | Yes    | No              | No              |
| PEG900/ $\beta$ -CD (4:1)   | Yes   | Yes   | Yes    | Yes             | Yes, signal low |
| PEG900/ $\beta$ -CD (14:1)  | Yes   | Yes   | Yes    | No              | No              |
| PEG2000/ $\beta$ -CD (10:1) | Yes   | Yes   | Yes    | Yes, signal low | Yes, signal low |
| PPG2000/ $\beta$ -CD (10:1) | Yes   | Yes   | Yes    | No              | No              |

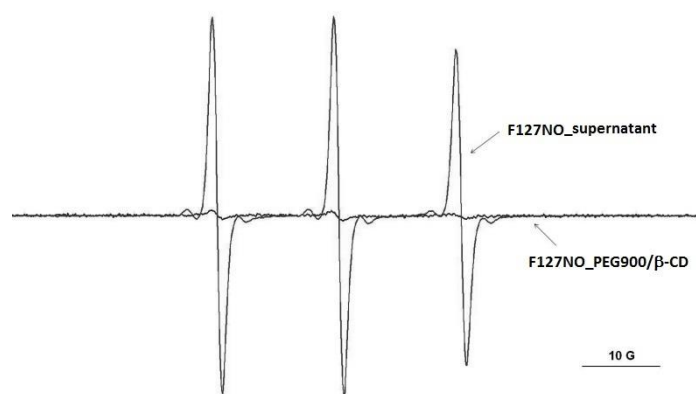

**Figure S2.** The EPR spectra of F127NO in PEG900/β-CD (10:1) hydrogel and in supernatant, after equilibration.

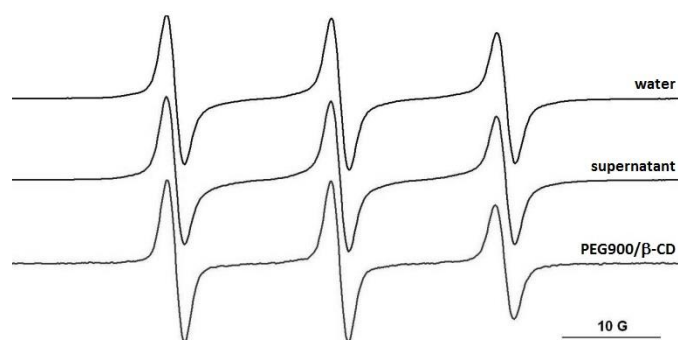

**Figure S3.** The EPR spectra of P123NO in water, in PEG900/β-CD (10:1) hydrogel and in supernatant, after equilibration.

**Table S2.** Hyperfine coupling constants ( $a_N$ ) and rotational correlation times ( $\tau$ ) of spin probes in alginate, semi-IPN and IPN hydrogels

| <b>ALG_Ca</b>         | <b>2a<sub>N</sub> (G)</b> | <b>a<sub>N</sub> (G)</b> | <b>ΔH<sub>0</sub> (G)</b> | <b>h<sub>-1</sub></b> | <b>h<sub>0</sub></b> | <b>h<sub>+1</sub></b> | <b>τ×10<sup>10</sup> (s)</b> |
|-----------------------|---------------------------|--------------------------|---------------------------|-----------------------|----------------------|-----------------------|------------------------------|
| 4-amino-TEMPO         | 33.86                     | 16.93                    | 1.75                      | 1.80                  | 1.80                 | 1.59                  | 0.75                         |
| 4-carboxy-TEMPO       | 34.20                     | 17.10                    | 1.71                      | 1.90                  | 1.90                 | 1.60                  | 0.99                         |
| L62NO                 | 31.99                     | 16.00                    | 1.34                      | 1.54                  | 1.95                 | 1.37                  | 2.74                         |
| F127NO                | 31.99                     | 16.00                    | 1.33                      | 1.81                  | 1.91                 | 1.57                  | 1.14                         |
| P123NO                | 32.01                     | 16.01                    | 1.33                      | 1.64                  | 1.90                 | 1.50                  | 1.77                         |
| <b>ALG_CHIT_Ca</b>    | <b>2a<sub>N</sub> (G)</b> | <b>a<sub>N</sub> (G)</b> | <b>ΔH<sub>0</sub> (G)</b> | <b>h<sub>-1</sub></b> | <b>h<sub>0</sub></b> | <b>h<sub>+1</sub></b> | <b>τ×10<sup>10</sup> (s)</b> |
| 4-amino-TEMPO         | 33.85                     | 16.93                    | 1.77                      | 1.90                  | 1.92                 | 1.73                  | 0.68                         |
| 4-carboxy-TEMPO       | 34.38                     | 17.19                    | 1.76                      | 1.87                  | 1.88                 | 1.68                  | 0.70                         |
| L62NO                 | 31.91                     | 15.96                    | 1.41                      | 1.78                  | 1.90                 | 1.52                  | 1.40                         |
| F127NO                | 32.02                     | 16.01                    | 1.37                      | 1.57                  | 1.90                 | 1.48                  | 2.10                         |
| P123NO                | 32.07                     | 16.04                    | 1.40                      | 1.41                  | 1.98                 | 1.40                  | 3.43                         |
| <b>ALG_CHIT_Ca_GA</b> | <b>2a<sub>N</sub> (G)</b> | <b>a<sub>N</sub> (G)</b> | <b>ΔH<sub>0</sub> (G)</b> | <b>h<sub>-1</sub></b> | <b>h<sub>0</sub></b> | <b>h<sub>+1</sub></b> | <b>τ×10<sup>10</sup> (s)</b> |
| 4-amino-TEMPO         | 33.87                     | 16.94                    | 1.79                      | 1.87                  | 1.92                 | 1.69                  | 0.91                         |
| 4-carboxy-TEMPO       | 34.39                     | 17.20                    | 1.64                      | 1.91                  | 1.92                 | 1.72                  | 0.66                         |
| L62NO                 | 31.89                     | 15.95                    | 1.31                      | 1.74                  | 1.85                 | 1.49                  | 1.24                         |
| F127NO                | 31.90                     | 15.95                    | 1.25                      | 1.51                  | 1.55                 | 1.25                  | 1.05                         |
| P123NO                | 31.84                     | 15.92                    | 1.32                      | 1.62                  | 1.83                 | 1.44                  | 1.63                         |
| <b>ALG_CHIT_GA_Ca</b> | <b>2a<sub>N</sub> (G)</b> | <b>a<sub>N</sub> (G)</b> | <b>ΔH<sub>0</sub> (G)</b> | <b>h<sub>-1</sub></b> | <b>h<sub>0</sub></b> | <b>h<sub>+1</sub></b> | <b>τ×10<sup>10</sup> (s)</b> |
| 4-amino-TEMPO         | 33.60                     | 16.80                    | 1.96                      | 1.37                  | 1.99                 | 1.07                  | 0.73                         |
| 4-carboxy-TEMPO       | 34.28                     | 17.14                    | 1.78                      | 1.80                  | 1.95                 | 1.57                  | 1.78                         |
| L62NO                 | 31.83                     | 15.92                    | 1.18                      | 1.75                  | 1.80                 | 1.36                  | 1.26                         |
| F127NO                | 31.93                     | 15.97                    | 1.39                      | 1.90                  | 1.93                 | 1.44                  | 1.53                         |
| P123NO                | 31.79                     | 15.90                    | 1.35                      | 1.60                  | 1.80                 | 1.44                  | 1.61                         |
| <b>ALG_CHIT_GA</b>    | <b>2a<sub>N</sub> (G)</b> | <b>a<sub>N</sub> (G)</b> | <b>ΔH<sub>0</sub> (G)</b> | <b>h<sub>-1</sub></b> | <b>h<sub>0</sub></b> | <b>h<sub>+1</sub></b> | <b>τ×10<sup>10</sup> (s)</b> |
| 4-amino-TEMPO         | 33.80                     | 16.90                    | 1.76                      | 1.90                  | 1.97                 | 1.72                  | 0.97                         |
| 4-carboxy-TEMPO       | 34.34                     | 17.17                    | 1.82                      | 1.96                  | 1.99                 | 1.53                  | 1.76                         |
| L62                   | 31.88                     | 15.94                    | 1.33                      | 1.86                  | 1.94                 | 1.38                  | 1.79                         |
| F127                  | 31.83                     | 15.92                    | 1.37                      | 1.89                  | 1.91                 | 1.48                  | 1.24                         |
| P123                  | 31.71                     | 15.86                    | 1.41                      | 1.66                  | 1.78                 | 1.25                  | 2.09                         |

Note: Rotational correlation times,  $\tau$ , were calculated using the equation:

$$\tau_c = 6.51 \times 10^{-10} \Delta H_0 \left[ \left( \frac{h_0}{h_{-1}} \right)^{1/2} + \left( \frac{h_0}{h_{+1}} \right)^{1/2} - 2 \right]$$

where  $\Delta H_0$  is the peak-to-peak width (in Gauss) of the central line, and  $h_{-1}$ ,  $h_0$  and  $h_{+1}$  are the heights of the low, central and high field lines, respectively [Stones, T.J.; Buckman, T.; Nordio, P.L.; McConnell, H.M. Spin-labeled biomolecules. *Proc. Natl. Acad. Sci. U.S.A.* **1965**, *54*, 1010–1017. doi: 10.1073/pnas.54.4.1010].
